# Supplementary material for: The Effect of Arginase on Canine T-Lymphocyte Functions and its Modulation by All-Trans Retinoid Acid (ATRA) in Canine Monocyte-Derived Macrophages
Source: MDPI journal article supplement (doi:10.3390/vetsci9070374), 2022-07-21
Supplement: s1 [file s1]

Supplementary Table S2. Antibodies utilized.

| Antigen/marker | Conjugated fluorochrome | Antigen species | Antibody clone # | Manufacturer       | Catalogue # | Dilution |
|----------------|-------------------------|-----------------|------------------|--------------------|-------------|----------|
| Cell Surface   |                         |                 |                  |                    |             |          |
| Viability dye  | Aqua                    | N/A             | N/A              | Thermo Fisher      | L34966      | 1:1000   |
| Fc block       | N/A                     | Canine          | N/A              | eBioscience        | 14-9162-41  | 1:5      |
| CD4            | APC                     | Canine          | YKIX302.9        | Invitrogen         | 17-5040-42  | 1:10     |
| CD8            | PerCp-Cy5.5             | Canine          | YCATE55.9        | eBioscience        | 46-5080-41  | 1:25     |
| CD25           | PE                      | Canine          | P4A10            | eBioscience        | 12-0260-042 | 1:10     |
| CD5            | PerCp-ef710             | Canine          | YKIX322.3        | eBioscience        | 5016058     | 1:10     |
| CD11b          | Biotin                  | Canine          | CA24.3E4         | Moore lab          | BDB563259   | 1:50     |
| Streptavidin   | BV421                   | N/A             | N/A              | BD Biosciences     | 563259      | 1:50     |
| CD14           | PE                      | Human           | TUK4             | Invitrogen         | MHCD1404    | 1:25     |
| MHCII          | APC                     | Canine          | YKIX334.2        | Thermo Fisher      | 17-5909-42  | 1:10     |
| CD80           | PE-CF594                | Murine          | 16-10A1          | Thermo Fisher (BD) | BDB562504   | 1:25     |
| Intracellular  |                         |                 |                  |                    |             |          |
| CD3            | FITC                    | Human           | CD3-12           | eBioscience        | MCA1477F    | 1:50     |
| Granzyme B     | PE-TR                   | Human           | GB11             | Invitrogen         | GRB17       | 1:50     |

|      |        |              |        |             |            |      |
|------|--------|--------------|--------|-------------|------------|------|
| Ki67 | PE-Cy7 | Canine/Human | 20Raj1 | eBioscience | 25-5699-42 | 1:10 |
|------|--------|--------------|--------|-------------|------------|------|
