# Supplementary material for: The Effect of Arginase on Canine T-Lymphocyte Functions and its Modulation by All-Trans Retinoid Acid (ATRA) in Canine Monocyte-Derived Macrophages
Source: MDPI journal article supplement (doi:10.3390/vetsci9070374), 2022-07-21
Supplement: s1 [file s1]

Supplementary Table S1. Clinical characteristics of dogs included.

| Age (yrs)                                                                  | Sex/neuter status | Breed              | Weight (kg) | Disease                                                  |
|----------------------------------------------------------------------------|-------------------|--------------------|-------------|----------------------------------------------------------|
| MDM RTqPCR                                                                 |                   |                    |             |                                                          |
| 9                                                                          | MN                | GSD                | 46          | Multicentric B cell lymphoma                             |
| 9                                                                          | FS                | Labrador retriever | 38          | Multicentric B cell lymphoma                             |
| 10                                                                         | MC                | Labrador retriever | 34          | Vertebral mass of unknown etiology                       |
| 4                                                                          | MC                | Mixed              | 32          | Multicentric lymphoma of unknown phenotype               |
| 13                                                                         | MN                | Mixed              | 32          | Lipomas                                                  |
| 11                                                                         | FS                | Mixed              | 27          | Multicentric B cell lymphoma                             |
| MDM arginase assay                                                         |                   |                    |             |                                                          |
| 9                                                                          | FS                | Labrador retriever | 32          | Oral malignant melanoma                                  |
| 9                                                                          | MC                | Weimaraner         | 48          | Meningioma                                               |
| 10                                                                         | MC                | Mixed              | 35          | Metastatic prostate carcinoma*                           |
| 12                                                                         | MC                | Welsh terrier      | 13          | Metastatic pulmonary carcinoma*                          |
| 11                                                                         | MC                | Pitbull            | 29          | Multicentric B cell lymphoma                             |
| 11                                                                         | MC                | Golden retriever   | 46          | Liposarcoma                                              |
| MDM ELISA                                                                  |                   |                    |             |                                                          |
| 12                                                                         | MC                | Border Collie      | 32          | Multicentric B cell lymphoma                             |
| 11                                                                         | MC                | Pitbull terrier    | 30          | Metastatic osteosarcoma                                  |
| 9                                                                          | MC                | Mixed              | 29          | Metastatic prostate carcinoma                            |
| 14                                                                         | FS                | Mixed              | 23          | Oral carcinoma (suspect salivary origin)                 |
| 8                                                                          | MC                | Labrador retriever | 24          | Multicentric B cell lymphoma                             |
| 13                                                                         | F                 | Maltese terrier    | 3           | Multicentric B cell lymphoma and multiple mammary tumors |
| 9                                                                          | MC                | Mixed              | 31          | Multicentric B cell lymphoma                             |
| MDM flow cytometry                                                         |                   |                    |             |                                                          |
| 12                                                                         | FS                | Pit Bull terrier   | 23          | Multicentric B cell lymphoma                             |
| 6                                                                          | FS                | Boxer              | 28          | Mast cell tumor                                          |
| 11                                                                         | FS                | Mixed              | 27          | Multicentric B cell lymphoma                             |
| Changes in phenotype and proliferation of canine PBMCs exposed to arginase |                   |                    |             |                                                          |
| 2                                                                          | FS                | Labrador retriever | 30          | Metastatic mast cell tumor                               |
| 10                                                                         | MC                | Labrador retriever | 27          | Multiple cutaneous mast cell tumors                      |
| 8                                                                          | MC                | GSD                | 33          | Multicentric B cell lymphoma                             |

\* Control and ATRA-treated MDMs from these dogs were combined to provide sufficient numbers to input into the arginase activity assay

F = intact female; FS = female spayed; MC = male castrated

GSD = German shepherd dog
