# Supplementary material for: The Effect of Arginase on Canine T-Lymphocyte Functions and its Modulation by All-Trans Retinoid Acid (ATRA) in Canine Monocyte-Derived Macrophages
Source: MDPI journal article supplement (doi:10.3390/vetsci9070374), 2022-07-21
Supplement: s1 [file s1]

Supplementary Table S3. Primers utilized for RT-qPCR studies.

| Gene     | Forward primer (5'- 3') | Reverse primer (3'- 5') | RefSeq#        | Product size (bp) |
|----------|-------------------------|-------------------------|----------------|-------------------|
| IL10     | CAAGCCCTGTCGGAGATGAT    | TGATGTCTGGGTCGTGGTTC    | NM_001003077.1 | 76                |
| ARG1     | ACCCATCTCTGGGGAAGACA    | CCGAAGCAAGCCAGGGTTAT    | XM_532053.7    | 79                |
| NOS2     | CACGTTTGGGAACGGAGACT    | CTATTGGGGCGAGCTGAGAG    | NM_001313848.1 | 197               |
| TGFB1    | ACCACGCTAACTTCTGCCTG    | ACGTAGTACACGATGGGCAG    | NM_001003309.1 | 160               |
| IL6      | AGTGACCACTCCTGACCCAA    | GTGCTTCACGCACTCATCCT    | NM_001003301.1 | 76                |
| CIITA    | CTGGAGCTGCTGCACTGT      | GTCCAGGGAGAAGTCTTGGC    | XM_038669177.1 | 168               |
| C12orf43 | AATTCCGAGCCCACGTAGC     | CTCAGCCTTTCTCAGCTCCT    | XM_849238.1    | 92                |
| RPS5     | GAAGACTCAACCCGCATTGG    | CCTGATTCACACGGCGTAG     | XM_038655656.1 | 82                |
